# Supplementary material for: An n-type semiconducting diazaporphyrin-based hydrogen-bonded organic framework
Source: Royal Society of Chemistry journal article supplement (doi:10.1039/d4sc03455d), 2024-01-01
Supplement: d4sc03455d1.pdf [file d4sc03455d1.pdf]

## **Supporting Information**

### **An n-Type Semiconducting Diazaporphyrin-Based Hydrogen-Bonded Organic Framework**

**Takahiro Sakurai, Tappei Tanabe, Hiroaki Iguchi, Zhuowei Li, Wakana Matsuda, Yusuke  
Tsutsui, Shu Seki,<sup>\*</sup> Ryotaro Matsuda,<sup>\*</sup> and Hiroshi Shinokubo<sup>\*</sup>**

## Table of Contents

|                                                         |    |
|---------------------------------------------------------|----|
| 1. Instrumentation and materials .....                  | 3  |
| 2. Experimental procedures and compound data .....      | 4  |
| 3. NMR spectra.....                                     | 7  |
| 4. Mass spectra .....                                   | 10 |
| 5. Crystal data .....                                   | 14 |
| 6. Powder X-ray diffraction analysis .....              | 16 |
| 7. Thermogravimetric analysis .....                     | 17 |
| 8. Cyclic voltammograms.....                            | 18 |
| 9. Photophysical properties.....                        | 19 |
| 10. Electrical conductivity .....                       | 21 |
| 11. Impedance spectroscopy .....                        | 24 |
| 12. Transient absorption spectroscopy measurements..... | 25 |
| 13. Electron paramagnetic resonance spectroscopy .....  | 26 |
| 14. DFT calculations.....                               | 27 |
| 15. References .....                                    | 29 |

## 1. Instrumentation and materials

---

$^1\text{H}$  NMR (500 MHz) and  $^{13}\text{C}$  NMR (126 MHz) spectra were recorded on a Bruker AVANCE III HD spectrometer. Chemical shifts were reported as the delta scale in ppm relative to  $\text{CHCl}_3$  ( $\delta = 7.26$  ppm) and DMSO ( $\delta = 2.50$  ppm) for  $^1\text{H}$  NMR and  $\text{CDCl}_3$  ( $\delta = 77.16$  ppm) and DMSO ( $\delta = 39.52$  ppm) for  $^{13}\text{C}$  NMR. UV/vis/NIR absorption spectra were recorded on a JASCP V 670 spectrometer. Fourier transform infrared (FT-IR) spectra were recorded on a Shimadzu IR Sprint-T using ATR. High-resolution atmospheric pressure chemical ionization time-of-flight (APCI-TOF) mass spectra were taken on a Bruker micrOTOF instrument using a positive ionization mode. Single crystal X-ray data were obtained using a Rigaku CCD diffractometer (Saturn 724 with MicroMax-007) with Varimax Mo optics. Powder X-ray diffraction (PXRD) patterns at room temperature were measured on a Rigaku MiniFlex600 operating at 40 kV/15 mA producing  $\text{Cu K}\alpha$  radiation ( $\lambda = 1.5406 \text{ \AA}$ ) at room temperature ranging from  $3^\circ$  to  $55^\circ$  except for any additional information. The adsorption isotherm measurements for  $\text{N}_2$  and  $\text{CO}_2$  were performed using an automatic volumetric adsorption apparatus (BELSORP-max equipped with a cryostatic temperature controller; MicrotracBEL Corp.). The TGA profile was recorded using STA 2500 Regulus (Netzsch Japan Corp.). Cyclic voltammograms were obtained under the following conditions. Solvent: DMF, electrolyte: 0.1 M  $\text{Bu}_4\text{NPF}_6$ , working electrode: glassy carbon, counter electrode: Pt, reference electrode:  $\text{Ag}/\text{AgNO}_3$ , scan rate: 0.05 V/s, reference redox couple:  $\text{Fc}/\text{Fc}^+$ . All potentials are referenced to the potential of a ferrocene/ferrocenium cation couple.

*N,N*-Dimethylformamide (DMF) was purchased from Wako Pure Chemical Industries, Ltd. as a dehydrated grade. Diphenyldiazaporphyrin **4** was prepared according to the literature.<sup>[1]</sup> Unless otherwise noted, materials obtained from commercial suppliers were used without further purification.

## 2. Experimental procedures and compound data

### Synthesis of free-base 10,20-di(*p*-carboxymethylphenyl)-5,15-diazaporphyrin **1**

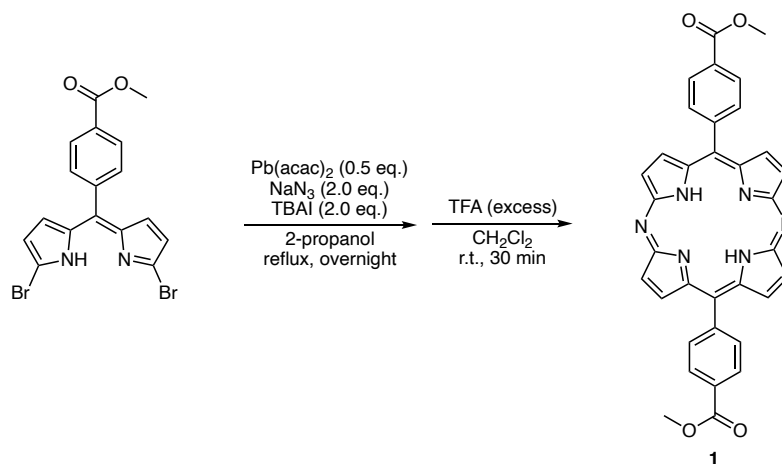

Diazaporphyrin **1** was synthesized according to the literature with some modifications.<sup>[2]</sup> In a flask, *meso*-(*p*-carboxymethylphenyl)dibromodipyrrin (2.62 g, 6.00 mmol),  $\text{Pb}(\text{acac})_2$  (1.22 g, 3.00 mmol),  $\text{NaN}_3$  (0.78 g, 12 mmol), tetrabutylammonium iodide (4.40 g, 12 mmol), and 2-propanol (600 mL) were added. The reaction mixture was refluxed overnight. After cooling to room temperature, water (100 mL) was added. The reaction mixture was evaporated until the amount of solvent became c.a. 200 mL. The residue was filtered and dissolved in  $\text{CH}_2\text{Cl}_2$  (150 mL). Trifluoroacetic acid (2 mL, 26 mmol) was added to the solution and stirred at room temperature for 30 min. Then, saturated  $\text{NaHCO}_3$  aq. (100 mL) was added. The reaction mixture was extracted by  $\text{CH}_2\text{Cl}_2$ . The organic layer was dried over anhydrous  $\text{Na}_2\text{SO}_4$  and concentrated in *vacuo*. The residue was purified by column chromatography ( $\text{SiO}_2$ ) with  $\text{CH}_2\text{Cl}_2$ /ethyl acetate = 10/1. The obtained solid was washed with acetone to obtain **1** (545 mg, 16 %) as a purple solid.  $^1\text{H}$  NMR (500 MHz,  $\text{CDCl}_3$ , 298 K):  $\delta$  = 9.33 (d,  $J$  = 5.0 Hz, 4H), 8.98 (d,  $J$  = 5.0 Hz, 4H), 8.51 (d,  $J$  = 8.0 Hz, 4H), 8.29 (d,  $J$  = 8.0 Hz, 4H), 4.15 (s, 6H), -2.82 (s, 2H) ppm;  $^{13}\text{C}$  NMR (126 MHz,  $\text{CDCl}_3$ , 298 K):  $\delta$  = 167.2, 144.1, 134.9, 133.6, 133.3, 130.5, 128.6, 121.6, 52.7 ppm; Two of aromatic  $^{13}\text{C}$  NMR signals were missing possibly because of overlapping. HRMS (APCI):  $[\text{M}+\text{H}]^+$  Calcd. for  $\text{C}_{34}\text{H}_{25}\text{N}_6\text{O}_4$  581.1932; Found 581.1934.

### Synthesis of nickel(II) 10,20-di(*p*-carboxymethylphenyl)-5,15-diazaporphyrin **2**

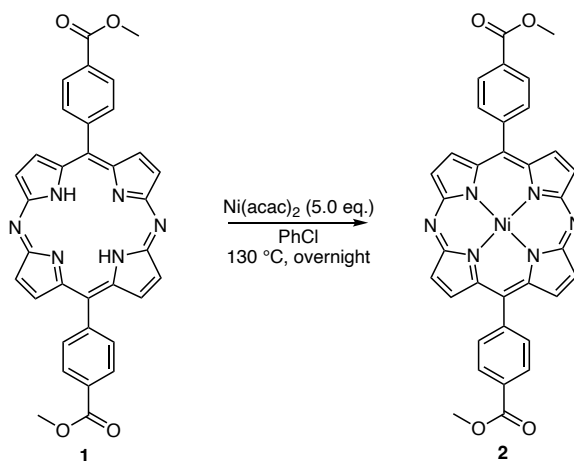

In a flask, **1** (545 mg, 0.94 mmol), Ni(acac)<sub>2</sub> (1.20 g, 4.7 mmol), and chlorobenzene (35 mL) were added. The reaction mixture was stirred at 130 °C for overnight. After cooling to room temperature, the reaction mixture was subjected to silica gel and eluted with hexane until chlorobenzene disappeared. Then, the desired Ni complex was eluted by CH<sub>2</sub>Cl<sub>2</sub>/ethyl acetate = 10/1. Recrystallization from CH<sub>2</sub>Cl<sub>2</sub>/MeOH afforded **2** (517 mg, 86%) as a purple solid. <sup>1</sup>H NMR (500 MHz, CDCl<sub>3</sub>, 298 K): δ = 9.06 (d, *J* = 5.0 Hz, 4H), 8.76 (d, *J* = 5.0 Hz, 4H), 8.47 (d, *J* = 8.0 Hz, 4H), 8.16 (d, *J* = 8.0 Hz, 4H), 4.14 (s, 6H) ppm; <sup>13</sup>C NMR (126 MHz, CDCl<sub>3</sub>, 298 K): δ = 167.2, 150.3, 143.7, 143.5, 134.3, 134.2, 134.0, 130.4, 128.5, 121.1, 52.7 ppm; HRMS (APCI): [M+H]<sup>+</sup> Calcd. for C<sub>34</sub>H<sub>22</sub>N<sub>6</sub>O<sub>4</sub>Ni 637.1129; Found 637.1105.

### Synthesis of nickel(II) 10,20-di(*p*-carboxyphenyl)-5,15-diazaporphyrin **3**

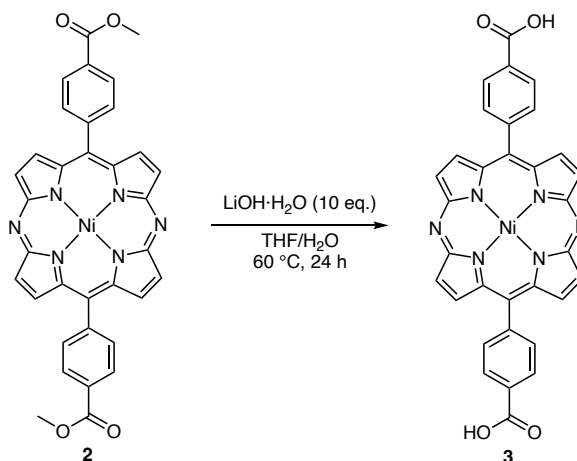

In a flask, **2** (257 mg, 0.40 mmol), LiOH·H<sub>2</sub>O (169 mg, 4.0 mmol), and THF/H<sub>2</sub>O = 15/15 mL were added. The reaction mixture was stirred at 60 °C for 24 h. After cooling to room temperature, the reaction mixture was evaporated to remove THF. Then, 2 M HCl aq. was added dropwise at 0 °C until the pH of the solution became 3. The precipitate was collected by filtration and washed

with MeOH to afford **3** (232 mg, 95%) as a purple solid.  $^1\text{H}$  NMR (500 MHz, DMSO- $d_6$ , 298 K):  $\delta$  = 13.38 (br, 2H), 8.97 (br, 4H), 8.61 (br, 4H), 8.41 (d,  $J$  = 6.4 Hz, 4H), 8.19 (d,  $J$  = 6.4 Hz, 4H) ppm;  $^{13}\text{C}$  NMR (126 MHz, DMSO- $d_6$ , 298 K):  $\delta$  = 167.4, 149.0, 142.4, 142.3, 134.2, 133.9, 133.6, 130.8, 128.2, 120.4 ppm; HRMS (APCI):  $[\text{M}+\text{H}]^+$  Calcd. for  $\text{C}_{32}\text{H}_{18}\text{N}_6\text{O}_4\text{Ni}$  609.0816; Found 609.0828.

### Synthesis of **3-3-HOF**

The single crystal suitable for X-ray analysis of **3-3-HOF** was prepared by vapor diffusion method using NMP as a good solvent and MeCN as a poor solvent. The powdery sample was synthesized using the liquid–liquid diffusion method using the same solvent as the vapor diffusion method.

### 3. NMR spectra

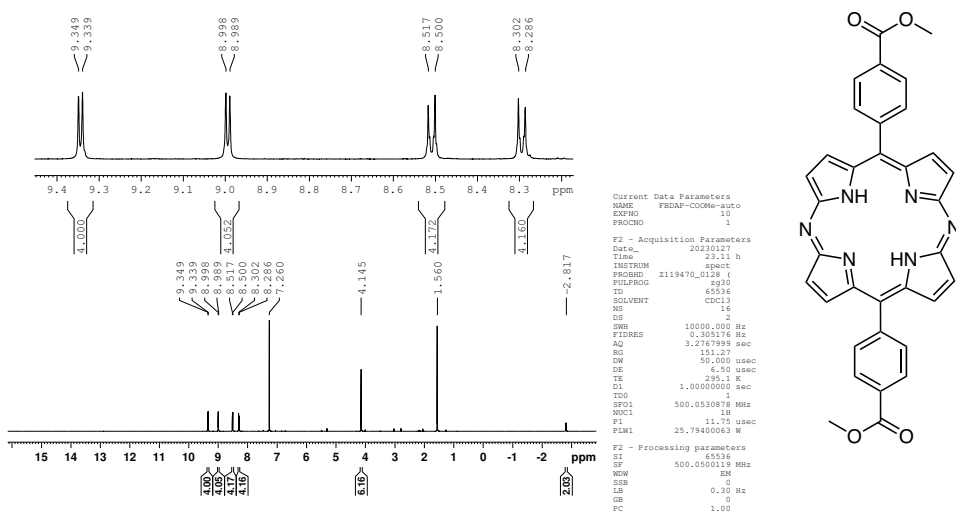

Figure S1. <sup>1</sup>H NMR spectrum of **1** in CDCl<sub>3</sub> at 25 °C.

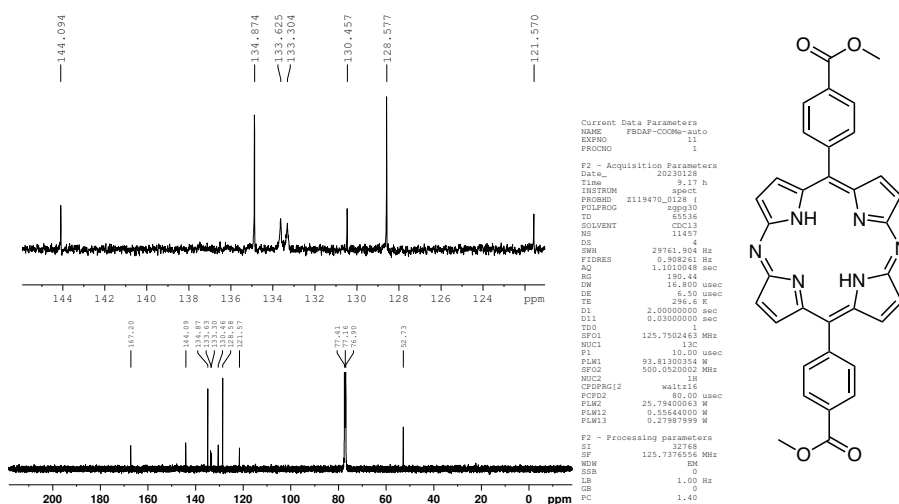

Figure S2. <sup>13</sup>C NMR spectrum of **1** in CDCl<sub>3</sub> at 25 °C.

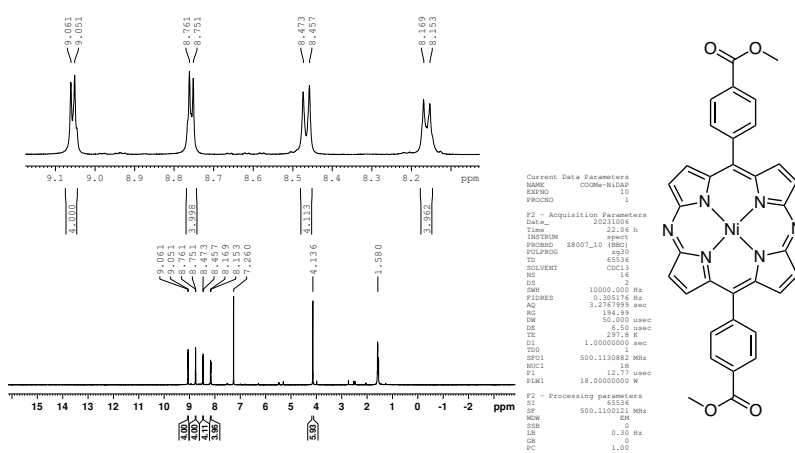

Figure S3.  $^1\text{H}$  NMR spectrum of **2** in  $\text{CDCl}_3$  at  $25^\circ\text{C}$ .

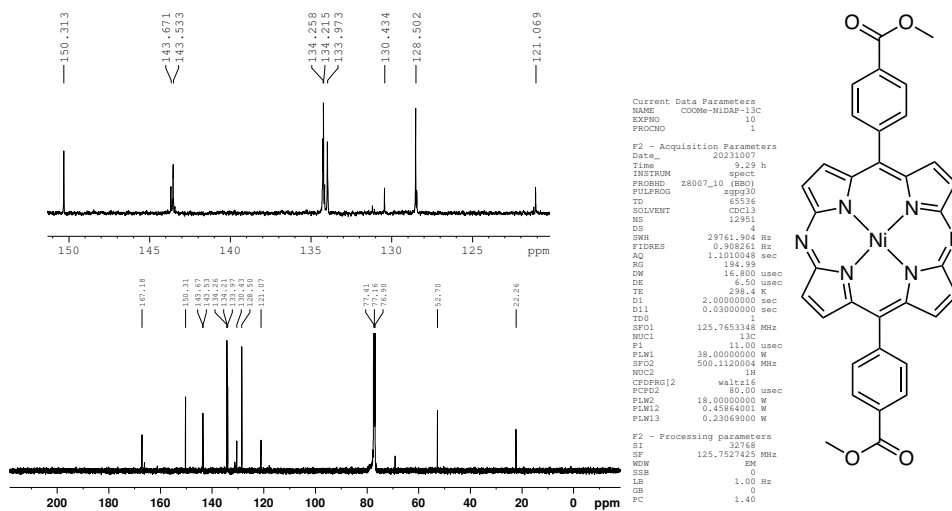

Figure S4.  $^{13}\text{C}$  NMR spectrum of **2** in  $\text{CDCl}_3$  at  $25^\circ\text{C}$ .



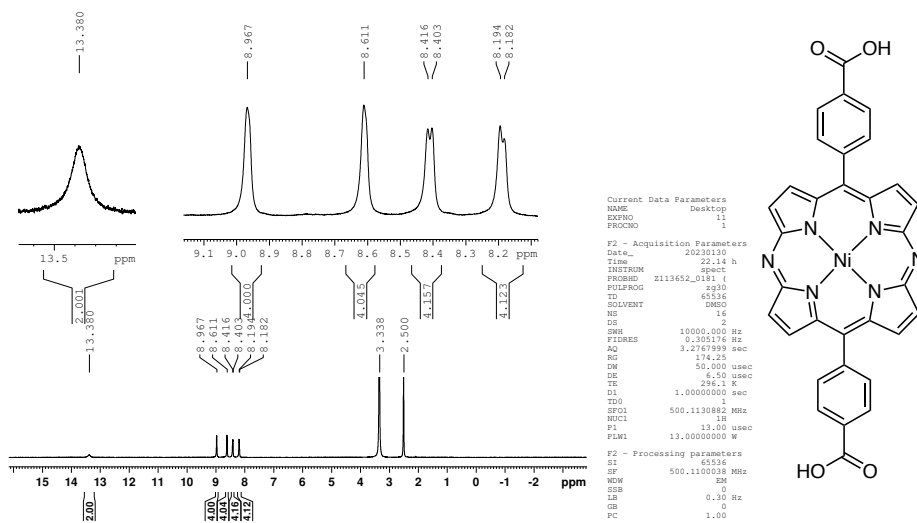

Figure S5.  $^1\text{H}$  NMR spectrum of **3** in  $\text{DMSO-}d_6$  at  $25^\circ\text{C}$ .

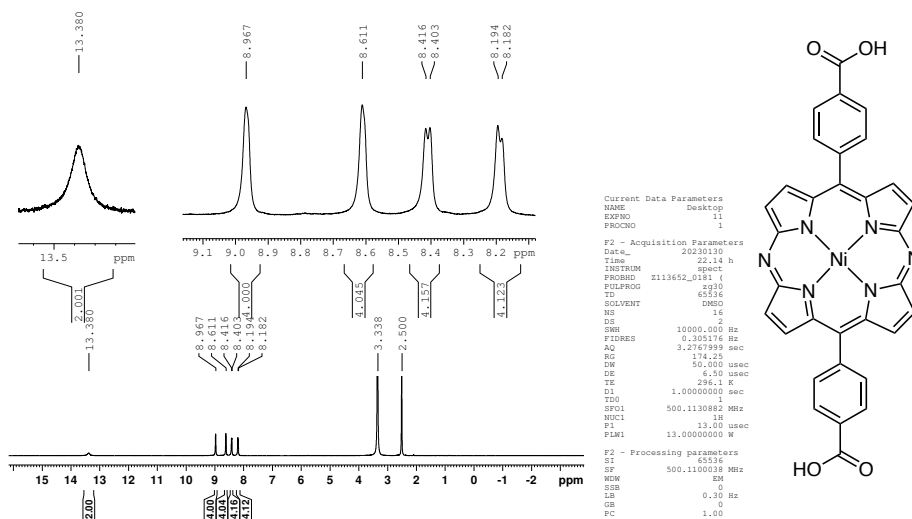

Figure S6.  $^{13}\text{C}$  NMR spectrum of **3** in  $\text{DMSO-}d_6$  at  $25^\circ\text{C}$ .

## 4. Mass spectra

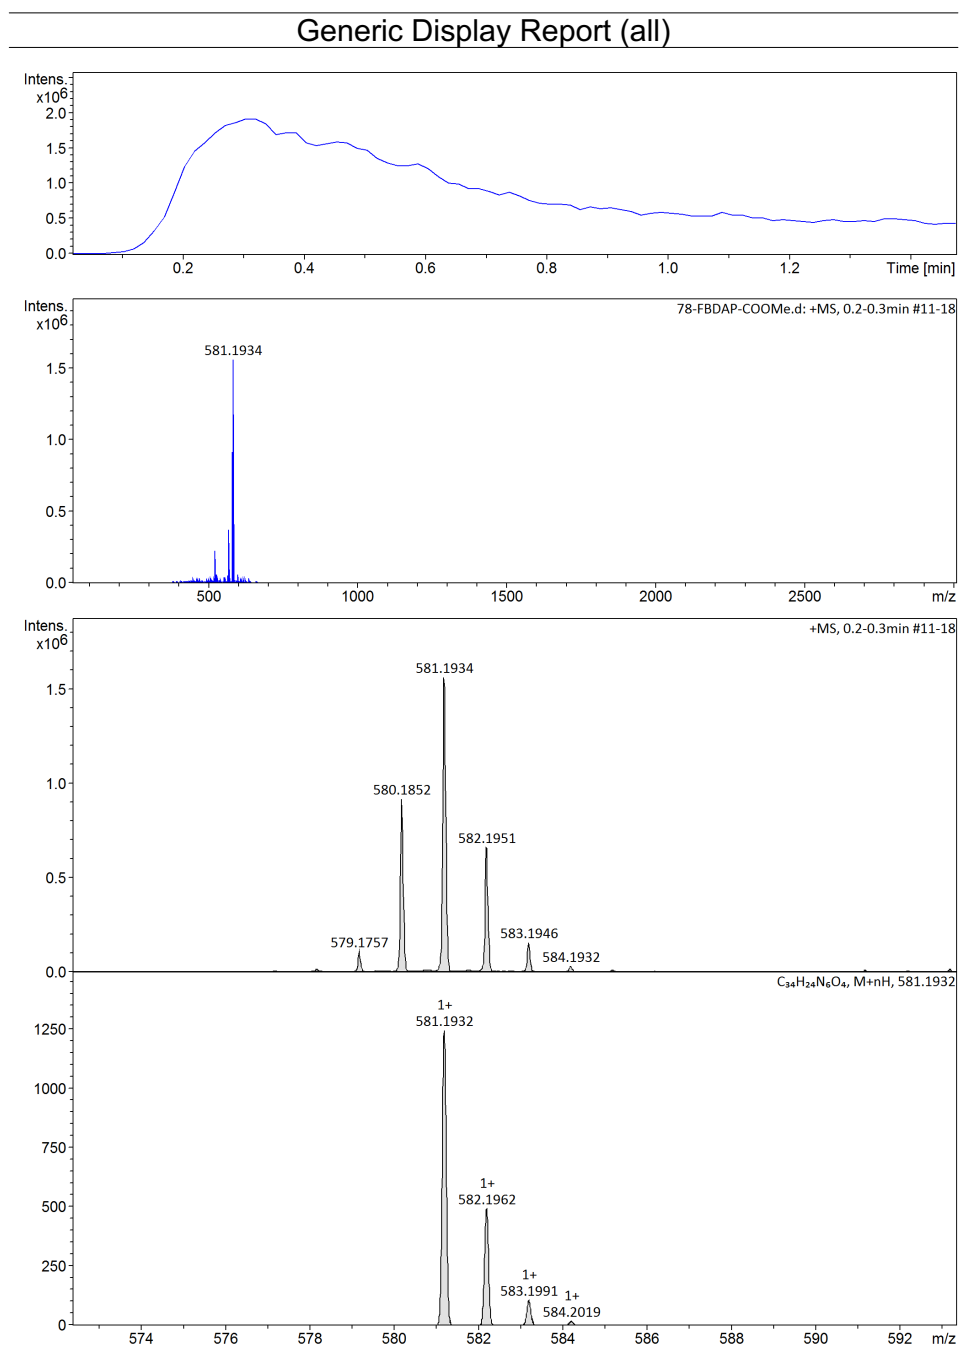

**Figure S7.** APCI-TOF-MS spectrum of **1**.

### Generic Display Report (all)

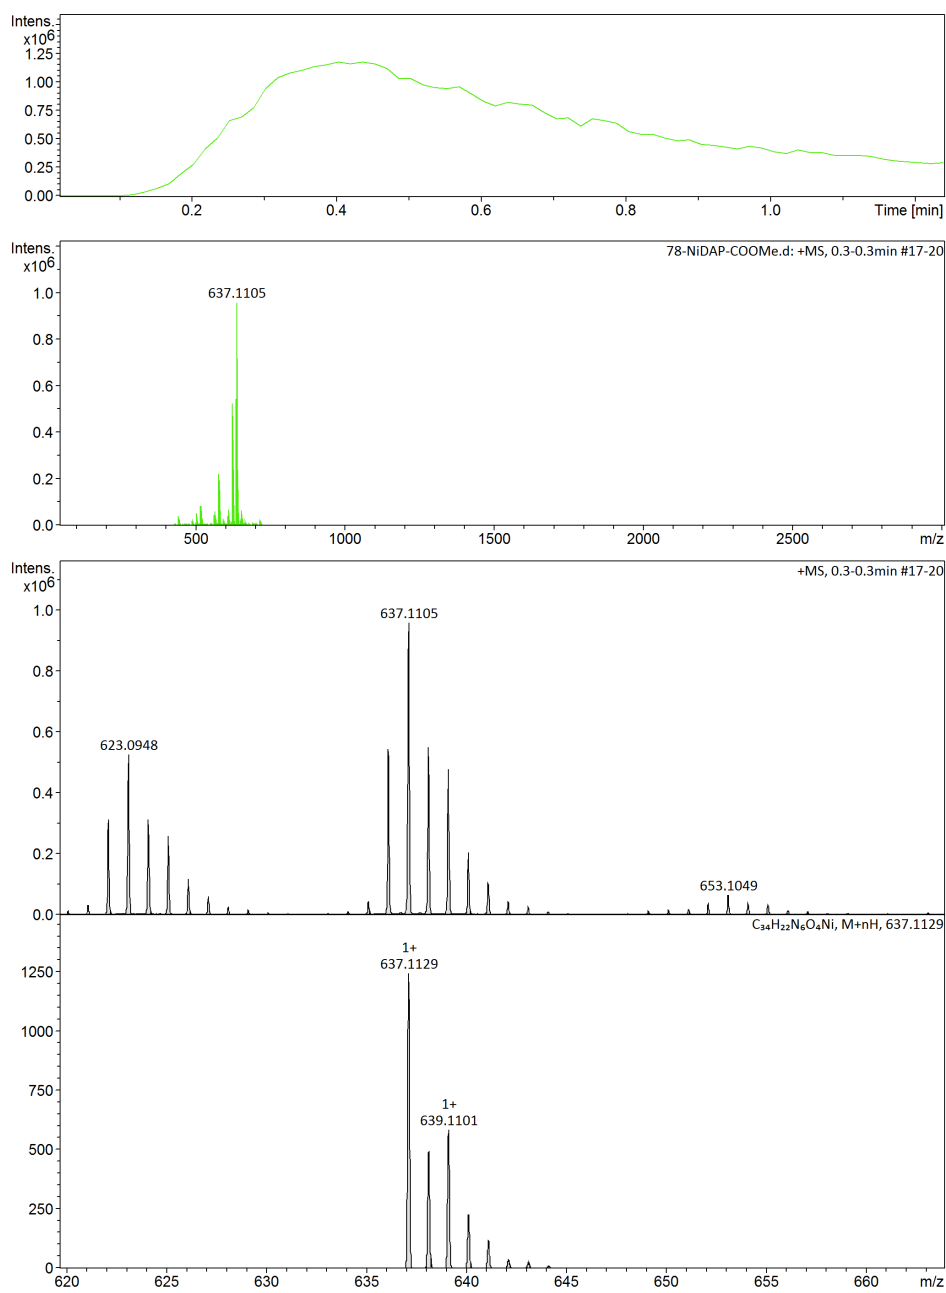

**Figure S8.** APCI-TOF-MS spectrum of **2**.

### Generic Display Report (all)

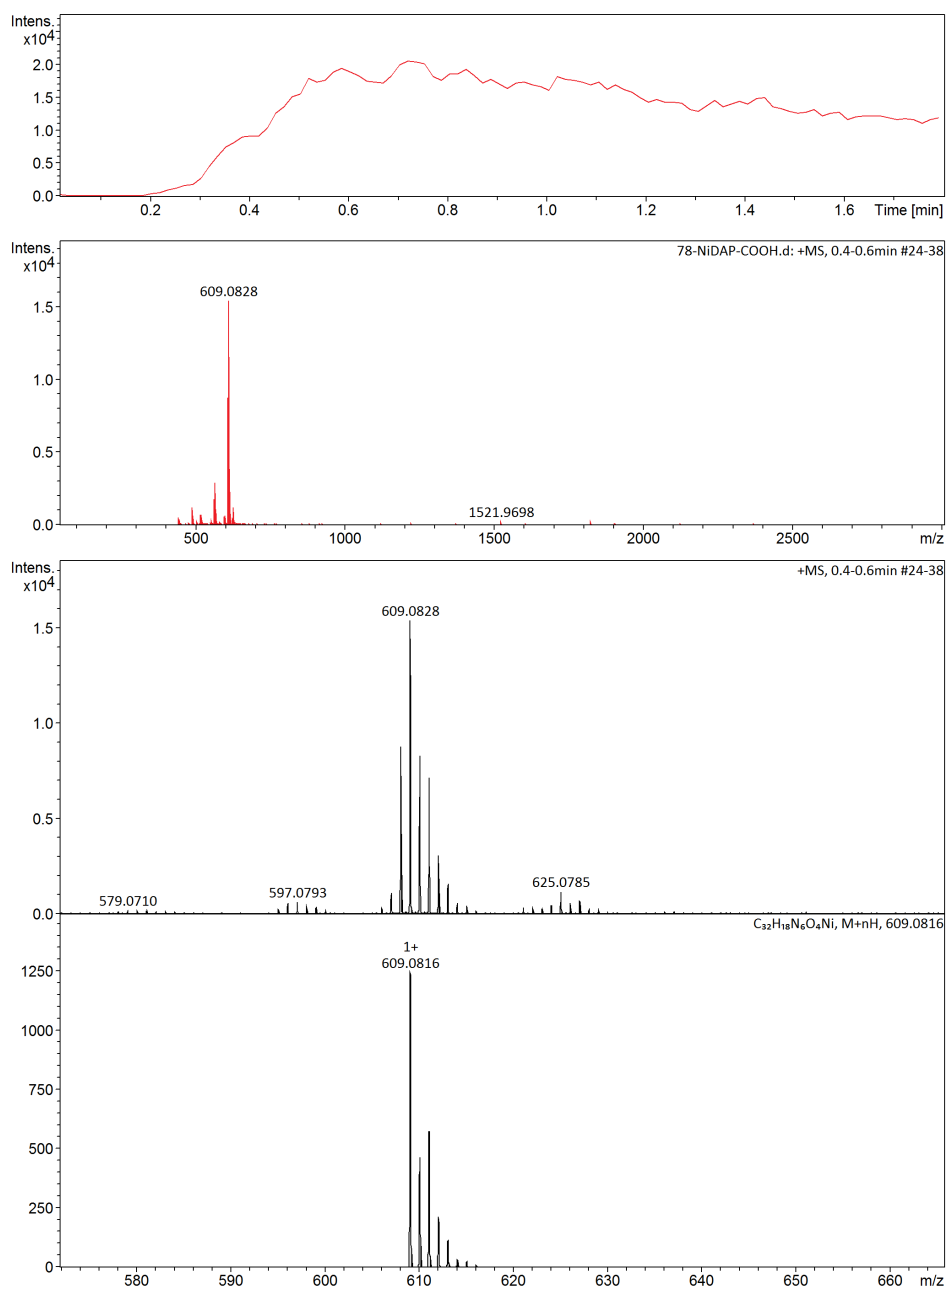

**Figure S9.** APCI-TOF-MS spectrum of **3**.

## 5. FT-IR Spectrum

---

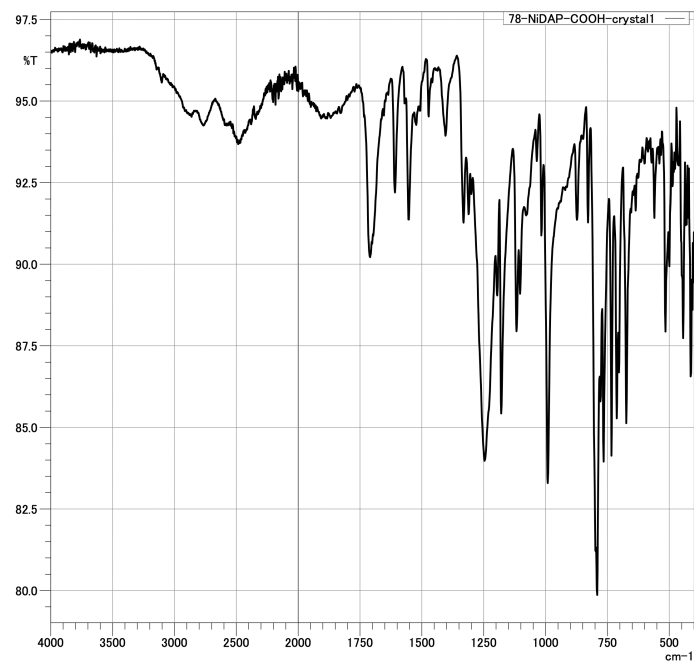

**Figure S10.** FT-IR spectrum of a powder sample of **3-HOF**.

Crystal data

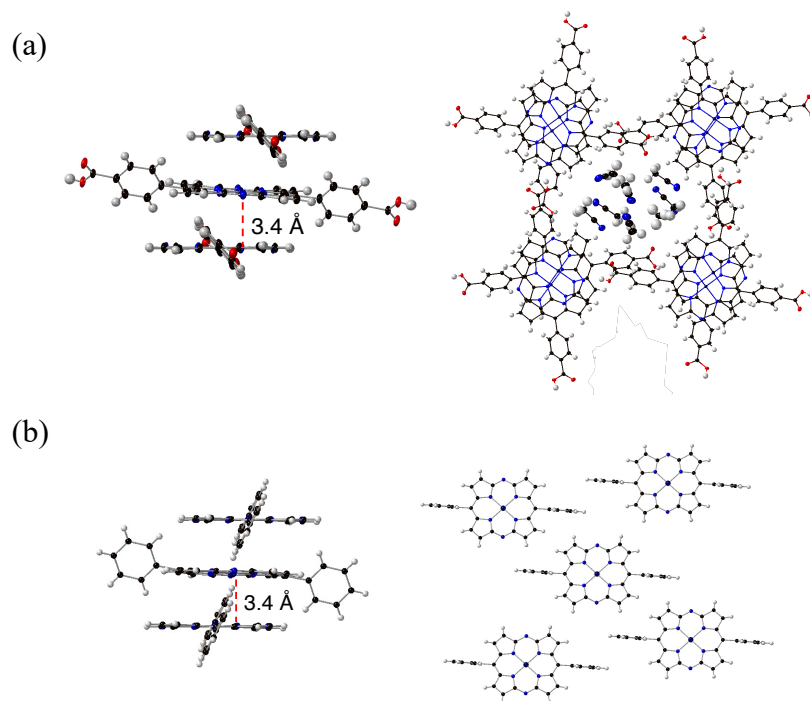

**Figure S11.** X-ray crystal structures of (a) **3-HOF** and (b) **4**. Thermal ellipsoids are shown at the 50% probability level.

**Table S1.** Crystallographic data of **3-HOF**.

---

|                                          |                                         |
|------------------------------------------|-----------------------------------------|
| compound                                 | <b>3-HOF</b>                            |
| Formula                                  | $C_{32}H_{18}N_6NiO_4 \cdot 4(C_2H_3N)$ |
| Formula weight                           | 773.45                                  |
| Crystal system                           | monoclinic                              |
| Space group                              | $P2_1/n$ (No. 14)                       |
| Crystal color                            | purple                                  |
| Crystal description                      | plate                                   |
| $a$ [Å]                                  | 7.6006(2)                               |
| $b$ [Å]                                  | 22.3585(4)                              |
| $c$ [Å]                                  | 20.9221(4)                              |
| $\beta$ [°]                              | 90.948(2)                               |
| $V$ [Å <sup>3</sup> ]                    | 3554.97(13)                             |
| $Z$                                      | 4                                       |
| $d_{\text{calcd}}$ [g cm <sup>-3</sup> ] | 1.445                                   |
| $R_1$ ( $I > 2\sigma(I)$ )               | 0.0741                                  |
| $wR_2$ (all data)                        | 0.1761                                  |
| Goodness-of-fit                          | 1.073                                   |
| Temperature [K]                          | 93(2)                                   |
| Solvent                                  | NMP/MeCN                                |
| CCDC No.                                 | 2331973                                 |

---

## 6. Powder X-ray diffraction analysis

---

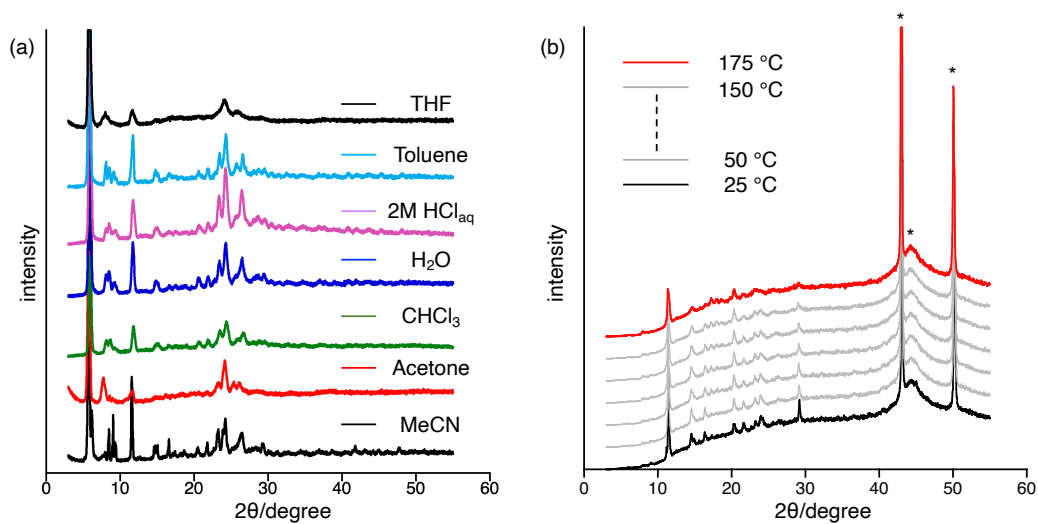

**Figure S12.** PXRD patterns of **3-HOF** (a) after soaking various solvents for 12 h and (b) at various temperatures. Peaks with an asterisk (\*) originated from the base.



## 7. Thermogravimetric analysis

---

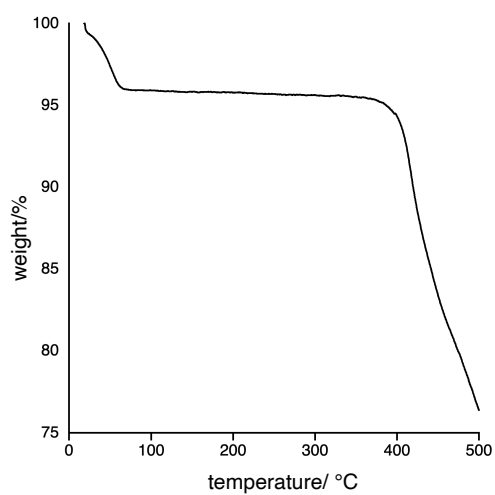

**Figure S13.** TGA profile of **3-HOF**. The heating gradient was  $5.0\text{ }^{\circ}\text{C min}^{-1}$ . The weight ratio of acetonitrile calculated from the crystal structure was not matched with this result, probably because some amount of acetonitrile was desolvated during the drying process.

## 8. Cyclic voltammograms

---

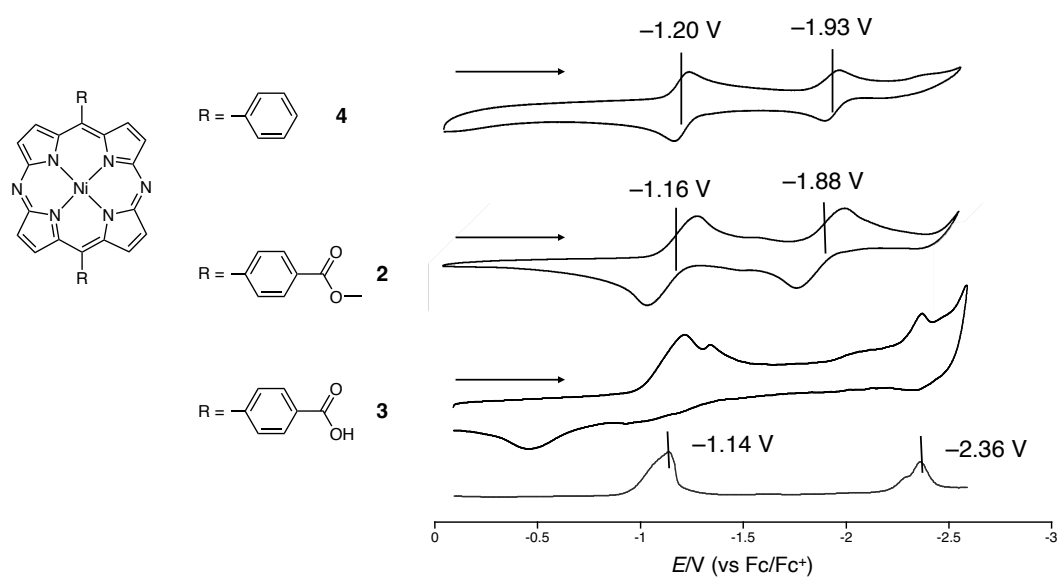

**Figure S14.** Cyclic voltammograms of **4**, **2**, and **3**.

## 9. Photophysical properties

---

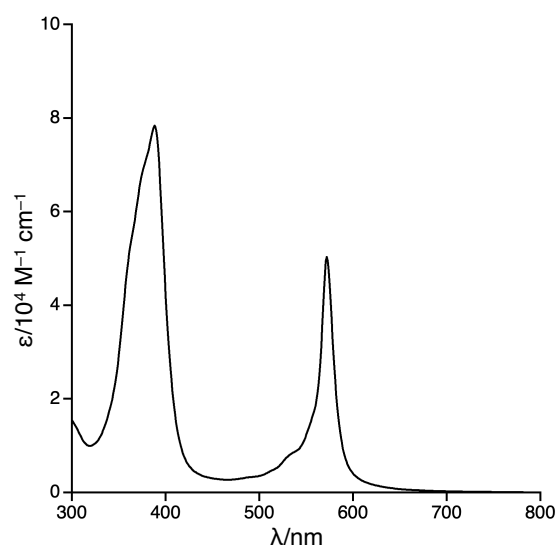

**Figure S15.** UV-vis absorption spectrum of **3** in DMF.

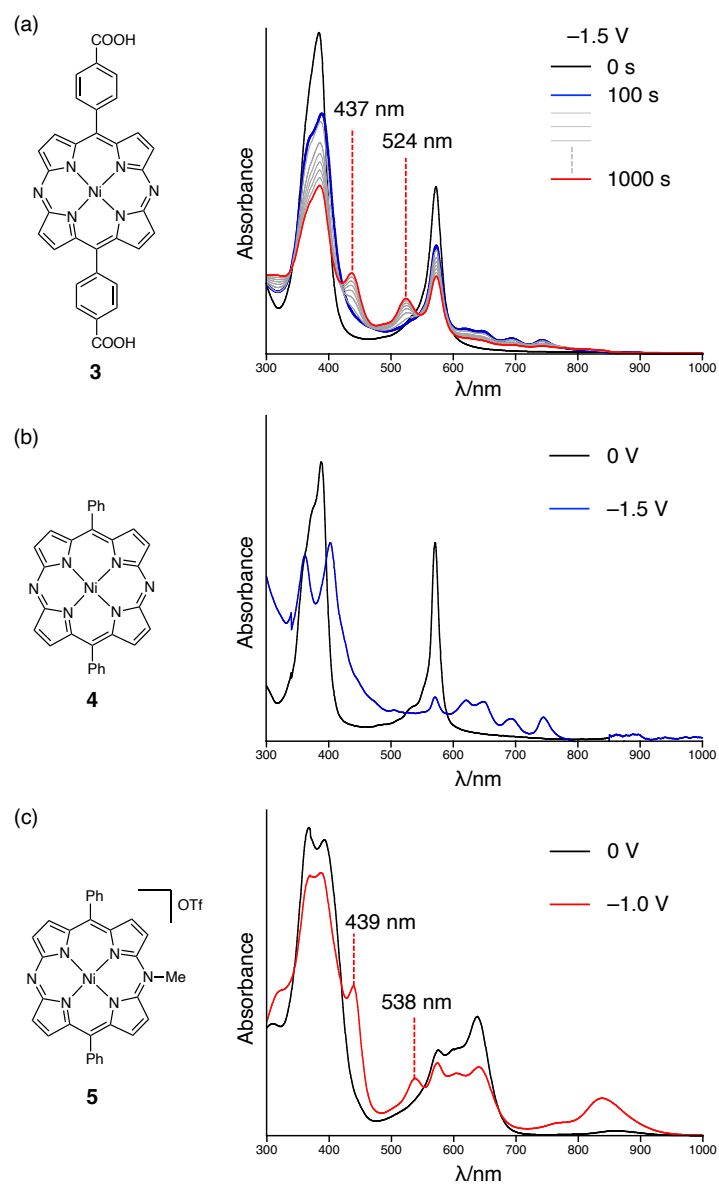

**Figure S16.** Change of absorption spectra of (a) **3**, (b) **4**, and (c) **5** in DMF upon one-electron reduction.

## 10. Electrical conductivity

---

Time Resolved Microwave Conductivity (TRMC) and Transient Absorption Spectroscopy (TAS) Transient photoconductivity was measured by a Flush Photoolysis-TRMC setup. A resonant cavity with  $Q \sim 2500$  was used to obtain a high degree of sensitivity in the conductivity measurement. Proving microwave frequency and power were set at  $\sim 9.1$  GHz and 3.0 mW, respectively, such that the electric field of the microwave was sufficiently small not to disturb the translational motion of charge carriers. The observed value of photoconductivity converted to the product of the quantum yield  $\phi$  and the sum of charge-carrier mobilities  $\sum \mu$  by  $\phi \sum \mu = \Delta\sigma / eI_0 F_{\text{light}}$ , where  $e$ ,  $I_0$ ,  $F_{\text{light}}$ , and  $\Delta\sigma$  are elementary charge, incident photon density of excitation laser (photons per  $\text{m}^2$ ), a correction factor ( $\text{m}^{-1}$ ) and a transient photoconductivity, respectively. The sample was set at the point of electric field maximum in a resonant cavity. FP-TRMC experiments were performed at room temperature and under Ar-saturated conditions by continuous flowing for  $> 10$  min. The measurements of all the samples were performed for polycrystalline samples. These samples were fixed on a quartz substrate by poly(methmethacrylate) binders.

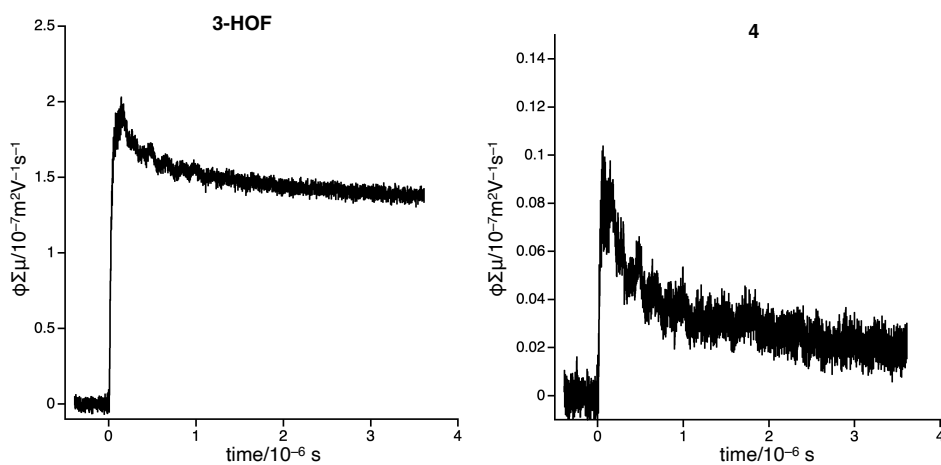

**Figure S17.** FP-TRMC measurements of **3-HOF**(left) and **4**(right) in polycrystalline form.

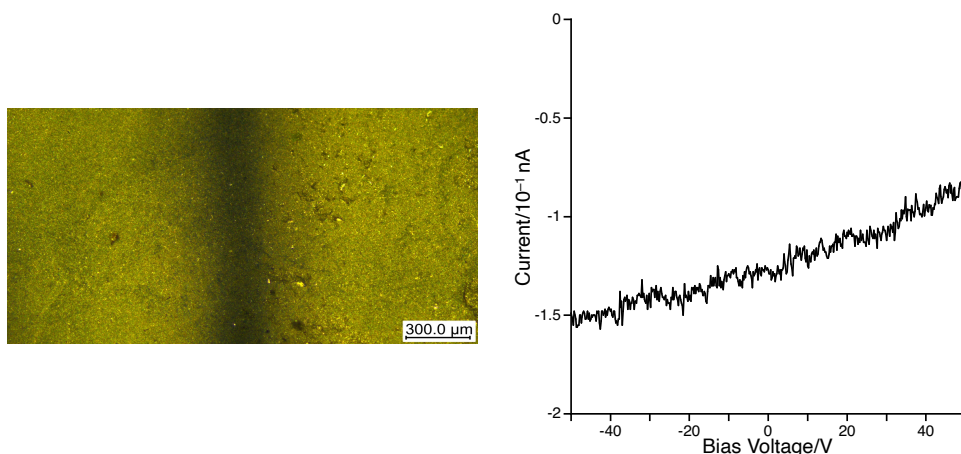

**Figure S18.** Optical microscope image of measured sample (left), and  $I$ - $V$  plot for pressed pellet of **3-HOF** (right).

**Table S2.** Selected conduction properties of PCMs

|                             | Material                          | Carrier   | $\phi\Sigma\mu$<br>/ $\text{m}^2\text{V}^{-1}\text{s}^{-1}$ | $\sigma/\text{Scm}^{-1}$ | $\sigma$ method | Ref.      |
|-----------------------------|-----------------------------------|-----------|-------------------------------------------------------------|--------------------------|-----------------|-----------|
|                             | <b>3-HOF</b>                      | electron  | $2.0 \times 10^{-7}$                                        | $6.2 \times 10^{-9}$     | 2-probe pellet  | This work |
| Porphyrin-based PCM         | COF-66                            | hole      | $1.7 \times 10^{-9}$                                        |                          |                 | 6         |
|                             | COF-366                           | hole      | $4.1 \times 10^{-9}$                                        |                          |                 | 6         |
|                             | H <sub>2</sub> P-COF              | hole      | $1.8 \times 10^{-8}$                                        |                          |                 | 7         |
|                             | CuP-COF                           | ambipolar | $9.0 \times 10^{-9}$                                        |                          |                 | 7         |
|                             | ZnP-COF                           | electron  | $1.2 \times 10^{-8}$                                        |                          |                 | 7         |
|                             | Pd-porphyrin<br>Zn-SURMOF2        | hole      | $1.2 \times 10^{-8}$                                        |                          |                 | 8         |
|                             | Free base porphyrin<br>Zn-SURMOF2 | hole      | $1.5\text{--}2.0 \times 10^{-8}$                            |                          |                 | 8         |
| TTF-based HOFs <sup>a</sup> | HOF-110                           | hole      | –                                                           | $2.2 \times 10^{-8}$     | 2-probe pellet  | 9         |
|                             | HOF-110@I <sub>2</sub> -1         | hole      | –                                                           | $2.7 \times 10^{-7}$     | 2-probe pellet  | 9         |
|                             | HOF-110@I <sub>2</sub> -2         | hole      | –                                                           | $6.0 \times 10^{-7}$     | 2-probe pellet  | 9         |
|                             | MUV-20a                           | hole      | –                                                           | $6.1 \times 10^{-7}$     | 2-probe pellet  | 10        |
|                             | MUV-20b                           | hole      | –                                                           | $1.4 \times 10^{-6}$     | 2-probe pellet  | 10        |
|                             | MUV-21                            | hole      | -                                                           | $6.2 \times 10^{-9}$     | 2-probe pellet  | 10        |

|                            |                                                                                                                                   |          |                       |                       |                                      |                                          |
|----------------------------|-----------------------------------------------------------------------------------------------------------------------------------|----------|-----------------------|-----------------------|--------------------------------------|------------------------------------------|
| TTF-based PCM              | Zn <sub>2</sub> TTFB                                                                                                              | hole     | $3 \times 10^{-9}$    | $5.0 \times 10^{-4}$  | time-resolved terahertz spectroscopy | $\phi\Sigma\mu$ :<br>11<br>$\sigma$ : 12 |
|                            | TTF-Ph-COF                                                                                                                        | –        | $1.1 \times 10^{-9}$  | $10^{-5}$             | 2-probe pellet                       | 13                                       |
|                            | TTF-Py-COF                                                                                                                        | –        | $5.0 \times 10^{-10}$ | $10^{-6}$             | 2-probe pellet                       | 13                                       |
| Others                     | Fe <sub>2</sub> (BDP) <sub>3</sub>                                                                                                | hole     | $\sim 10^{-8}$        | $3.5 \times 10^{-7}$  | 2-probe single crystal               | 14                                       |
|                            | K <sub>0.98</sub> Fe <sub>2</sub> (BDP) <sub>3</sub>                                                                              | hole     | $\sim 10^{-9}$        | $2.8 \times 10^{-2}$  | 2-probe single crystal               | 14                                       |
| Quinone-based PCM          | [Mn <sub>2</sub> (Cl <sub>2</sub> dmbq) <sub>3</sub> ]<br>[(Me <sub>4</sub> N) <sub>2</sub> ]                                     |          | –                     | $1.1 \times 10^{-13}$ | 2-probe pellet                       | 15                                       |
|                            | [Mn <sub>2</sub> (Cl <sub>2</sub> dmbq) <sub>3</sub> ]<br>[(Me <sub>4</sub> N) <sub>2</sub> ]@Na[C <sub>10</sub> H <sub>8</sub> ] | electron | –                     | $2.3 \times 10^{-8}$  | 2-probe pellet                       | 15                                       |
|                            | [Fe <sub>2</sub> (Cl <sub>2</sub> dmbq) <sub>3</sub> ]<br>[(Me <sub>2</sub> NH <sub>2</sub> ) <sub>2</sub> ]<br>(as synthesized)  | electron |                       | $1.4 \times 10^{-2}$  | 2-probe pellet                       | 16                                       |
|                            | [Fe <sub>2</sub> (Cl <sub>2</sub> dmbq) <sub>3</sub> ]<br>[(Me <sub>2</sub> NH <sub>2</sub> ) <sub>2</sub> ] (activated)          | electron |                       | $1.0 \times 10^{-3}$  | 2-probe pellet                       | 16                                       |
| NDI-based PCM <sup>b</sup> | Cu(DPNDI) <sub>2</sub>                                                                                                            | electron |                       | $1.0 \times 10^{-5}$  | 2-probe single crystal               | 17                                       |
|                            | Cd(DPNDI)<br>(as synthesized)                                                                                                     | electron |                       | $7.6 \times 10^{-6}$  | 2-probe pellet                       | 18                                       |
|                            | Cd(DPNDI)<br>(activated)                                                                                                          | electron |                       | $3.7 \times 10^{-2}$  | 2-probe pellet                       | 18                                       |

a; TTF = tetrathiafulvalene, b; NDI = naphthalenediimide

## 11. Impedance spectroscopy

---

Static and electrochemical conductivity measurements were carried out with ALS760E two-probe AC impedance measurement set-up. The powdered samples were compressed to ~ 0.5 mm in thickness and 5 mm in diameter. The HOF pellets were placed between two electrodes in an environmental chamber. All of the temperatures were kept for at least one hour so that the sample would achieve the equilibrium. Electrical conductivity was measured by the equation:  $\sigma = L/(R \cdot A)$ , where  $\sigma$ ,  $L$ ,  $R$ , and  $A$  are the conductivity (S cm<sup>-1</sup>), thickness of the pellet (cm), resistance of the pellet ( $\Omega$ ), and area of the pellet (cm<sup>2</sup>), respectively.

**Table S3.** Electrochemical impedance measurement of **3-HOF** at different temperatures.

| °C | $\sigma/\text{Scm}^{-1}$ , <sup>a</sup> |
|----|-----------------------------------------|
| 25 | $8.7 \times 10^{-7}$                    |
| 35 | $9.0 \times 10^{-7}$                    |
| 45 | $8.9 \times 10^{-7}$                    |
| 55 | $9.0 \times 10^{-7}$                    |
| 65 | $9.1 \times 10^{-7}$                    |

<sup>a</sup> Temperature dependence of the conductivity derived from the impedance measurements was analysed by Arrhenius equation as:

$$\sigma = \sigma_0 \exp\left(-\frac{E_a}{kT}\right),$$

where  $E_a$ ,  $\sigma_0$ ,  $k$ , and  $T$  are activation energy, a preexponential factor conductivity, Boltzmann constant, and temperature, respectively. The value of  $E_a$  was estimated as  $E_a = 6.4$  meV.



## 12. Transient absorption spectroscopy measurements

Transient absorption spectrum was carried out by the following setup. Identical polycrystalline sample to TRMC measurements was employed in the spectroscopy. The sample was photo-excited using third harmonics of nanosecond Nd:YAG pulsed laser (355 nm, 1.0 mJ, 10 Hz, EKSPLA NT341A). Continuous white light from a 150 W Xenon lamp (L14972-01) was used as a probe source and transmitted light has been spectrally dispersed by a monochromator with focal plane of 300 mm (C11119-04, Hamamatsu Photonics). It was also dispersed in the time domain with a high dynamic range streak camera (C13410-01A, Hamamatsu Photonics) and detected with a digital CMOS camera (ORCA-Flash4.0 V3 C13440-20CU, Hamamatsu Photonics). All the electrical timing was adjusted with a digital delay generator (DG645, Stanford Research Systems).

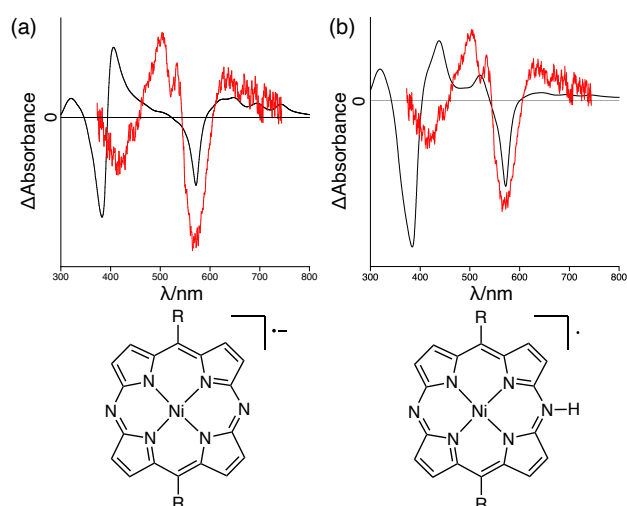

**Figure S19.** Comparison of the transient absorption spectrum of **3-HOF** in a PMMA film (red line) with differential absorption spectra between **3** and its one-electron reduced species in DMF (black line). (a) After 100 s and (b) after 1000 s.

### 13. Electron paramagnetic resonance spectroscopy

---

A JEOL JES-FA200 X-band spectrometer was used to obtain electron paramagnetic resonance (EPR) spectra at room temperature and under ambient conditions. In the EPR spectrum, **3-HOF** exhibits a signal at  $g = 2.0482$ .

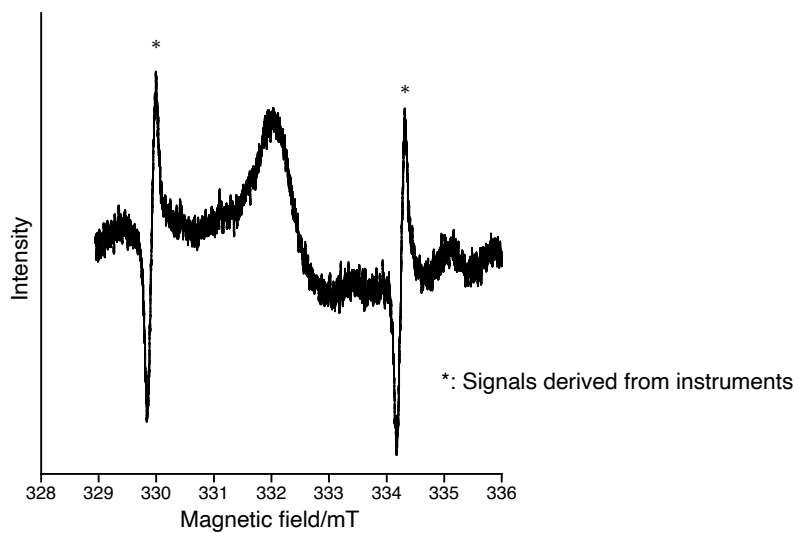

**Figure S20.** EPR spectrum of **3-HOF** in the solid state.

## 14. DFT calculations

All calculations were carried out using the Gaussian 09 program.<sup>[3]</sup> Initial geometries of **3** and **4** are obtained from their X-ray crystal structures. The structures of **3** and **4** were fully optimized without any symmetry restriction at Becke's three-parameter hybrid exchange functional and the Lee–Yang–Parr correlation functional (B3LYP)<sup>[4]</sup> with a basis set consisting of SDD<sup>[5]</sup> for Ni and 6-31G(d,p) for the rest. The calculations of transfer integrals were carried out with no optimization, and at PW91VWN/TZVP+SDD level.

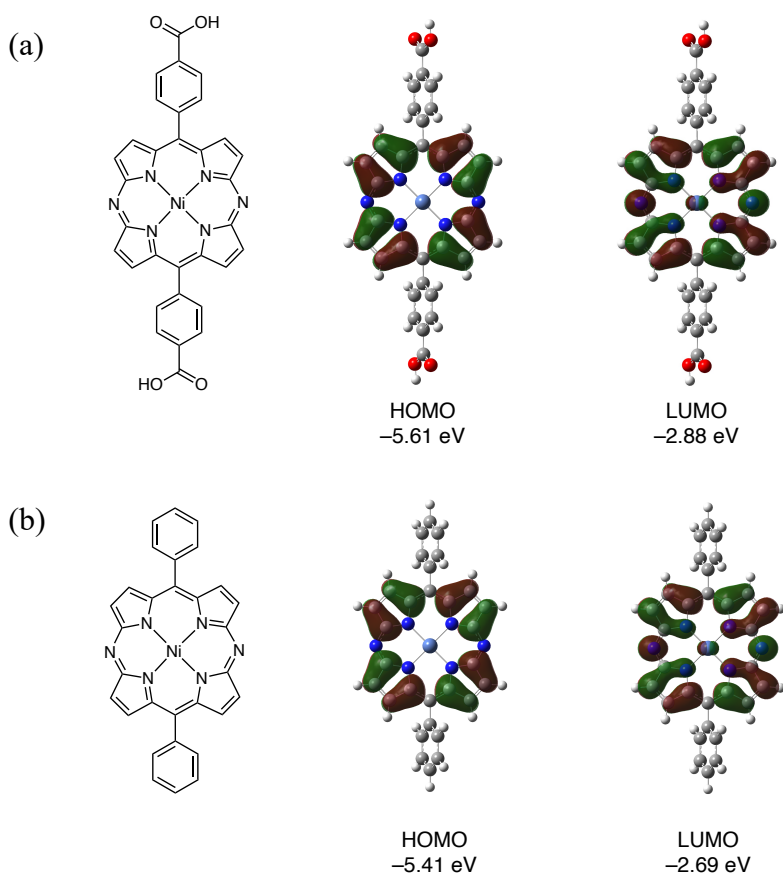

**Figure S21.** Calculated molecular orbitals of **3** and **4**.

(a)

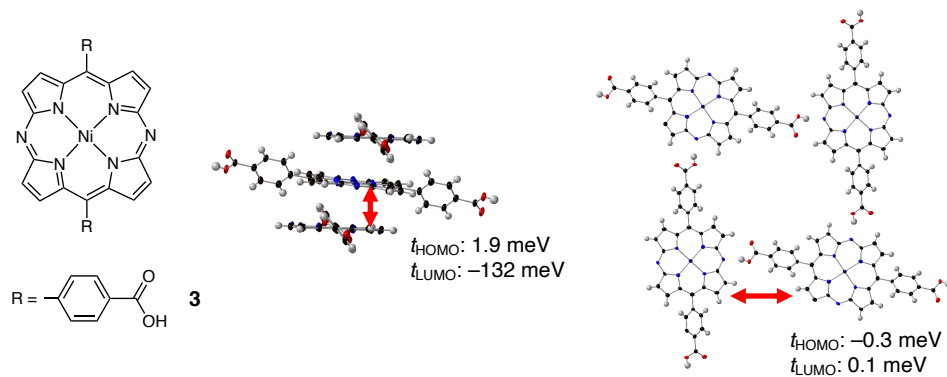

(b)

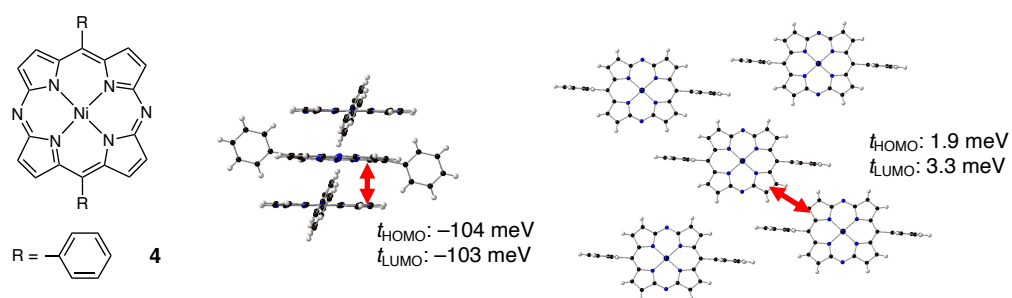

Figure S22. Calculated transfer integrals of (a) **3-HOF** and (b) **4**.

## 15. References

---

1. S. Mori, T. Sakurai, T. Nishimura, N. Fukui, Y. Miyake, H. Shinokubo, *J. Porphyrins Phthalocyanines* **2023**, A-G
2. Y. Matano, T. Shibano, H. Nakano, Y. Kimura, H. Imahori, *Inorg. Chem.* **2012**, *51*, 12879–12890.
3. Gaussian 09, Revision D.01, Frisch, M. J.; Trucks, G. W.; Schlegel, H. B.; Scuseria, G. E.; Robb, M. A.; Cheeseman, J. R.; Scalmani, G.; Barone, V.; Mennucci, B.; Petersson, G. A.; Nakatsuji, H.; Caricato, M.; Li, X.; Hratchian, H. P.; Izmaylov, A. F.; Bloino, J.; Zheng, G.; Sonnenberg, J. L.; Hada, M.; Ehara, M.; Toyota, K.; Fukuda, R.; Hasegawa, J.; Ishida, M.; Nakajima, T.; Honda, Y.; Kitao, O.; Nakai, H.; Vreven, T.; Montgomery, Jr., J. A.; Peralta, J. E.; Ogliaro, F.; Bearpark, M.; Heyd, J. J.; Brothers, E.; Kudin, K. N.; Staroverov, V. N.; Kobayashi, R.; Normand, J.; Raghavachari, K.; Rendell, A.; Burant, J. C.; Iyengar, S. S.; Tomasi, J.; Cossi, M.; Rega, N.; Millam, J. M.; Klene, M.; Knox, J. E.; Cross, J. B.; Bakken, V.; Adamo, C.; Jaramillo, J.; Gomperts, R.; Stratmann, R. E.; Yazyev, O.; Austin, A. J.; Cammi, R.; Pomelli, C.; Ochterski, J. W.; Martin, R. L.; Morokuma, K.; Zakrzewski, V. G.; Voth, G. A.; Salvador, P.; Dannenberg, J. J.; Dapprich, S.; Daniels, A. D.; Farkas, Ö.; Foresman, J. B.; Ortiz, J. V.; Cioslowski, J.; Fox, D. J. Gaussian, Inc., Wallingford CT, 2009.
4. (a) Becke, A. D. *Phys. Rev. A* **1988**, *38*, 3098. (b) Lee, C.; Yang, W.; Parr, R. G. *Phys. Rev. B* **1988**, *37*, 785.
5. Dolg, M.; Wedig, U.; Stoll, H.; Preuss, H. *J. Chem. Phys.* **1987**, *86*, 866.
